# Supplementary material for: In planta function of compatible solute transporters of the AtProT family
Source: PubMed Central journal article supplement — J Exp Bot. 2010 Oct 19;62(2):787–96. doi: 10.1093/jxb/erq320 (PMC3003823; doi:10.1093/jxb/erq320), 2010-10-19
Supplement: supp_erq320_00049908-file001.pdf [file supp_erq320_00049908-file001.pdf]

## *In planta* function of compatible solute transporters of the AtProT family

Silke Lehmann, Christophe Gumy, Eva Blatter, Silke Boeffel, Wieland Fricke and Doris Rentsch

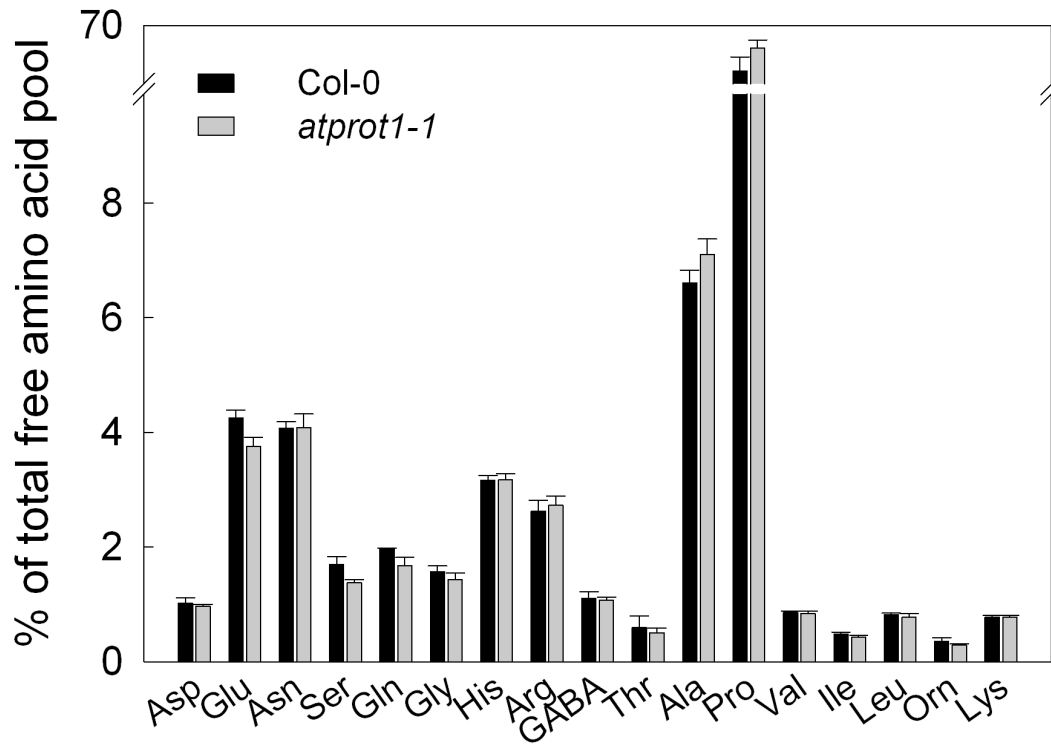

**Supplementary Fig. S1** Free amino acid composition of mature Col-0 and *atprot1-1* pollen. The relative amount of an amino acid is given as the mean of four composite samples  $\pm$  SD. Per gram pollen fresh weight, the extraction yielded between 0.75 and 0.95 mmol amino acids.
